# Supplementary material for: A 3D multifunctional host anode from commercial carbon cloth for lithium metal batteries
Source: Royal Society of Chemistry journal article supplement (doi:10.1039/d2ta09182h), 2023-01-01
Supplement: d2ta09182h1.pdf [file d2ta09182h1.pdf]

## Supplementary Material

### **A 3D multifunctional host anode from commercial carbon cloth for lithium metal batteries**

Fang Cheng<sup>a, c</sup>, Xiaoping Yang<sup>a, c</sup>, Ou Ka<sup>b, c</sup>, Lang Wen<sup>b, c</sup>, Xiaoqu Wang<sup>b, c</sup>, Wen Lu<sup>a, b, c</sup>\*

<sup>a</sup> College of Chemical Science and Engineering, Yunnan University, Kunming 650091, China

<sup>b</sup> School of Materials and Energy, Yunnan University, Kunming 650091, China

<sup>c</sup> Institute of Energy Storage Technologies, Yunnan University, Kunming 650091, China

\*Corresponding author

E-mail address: wenlu@ynu.edu.cn

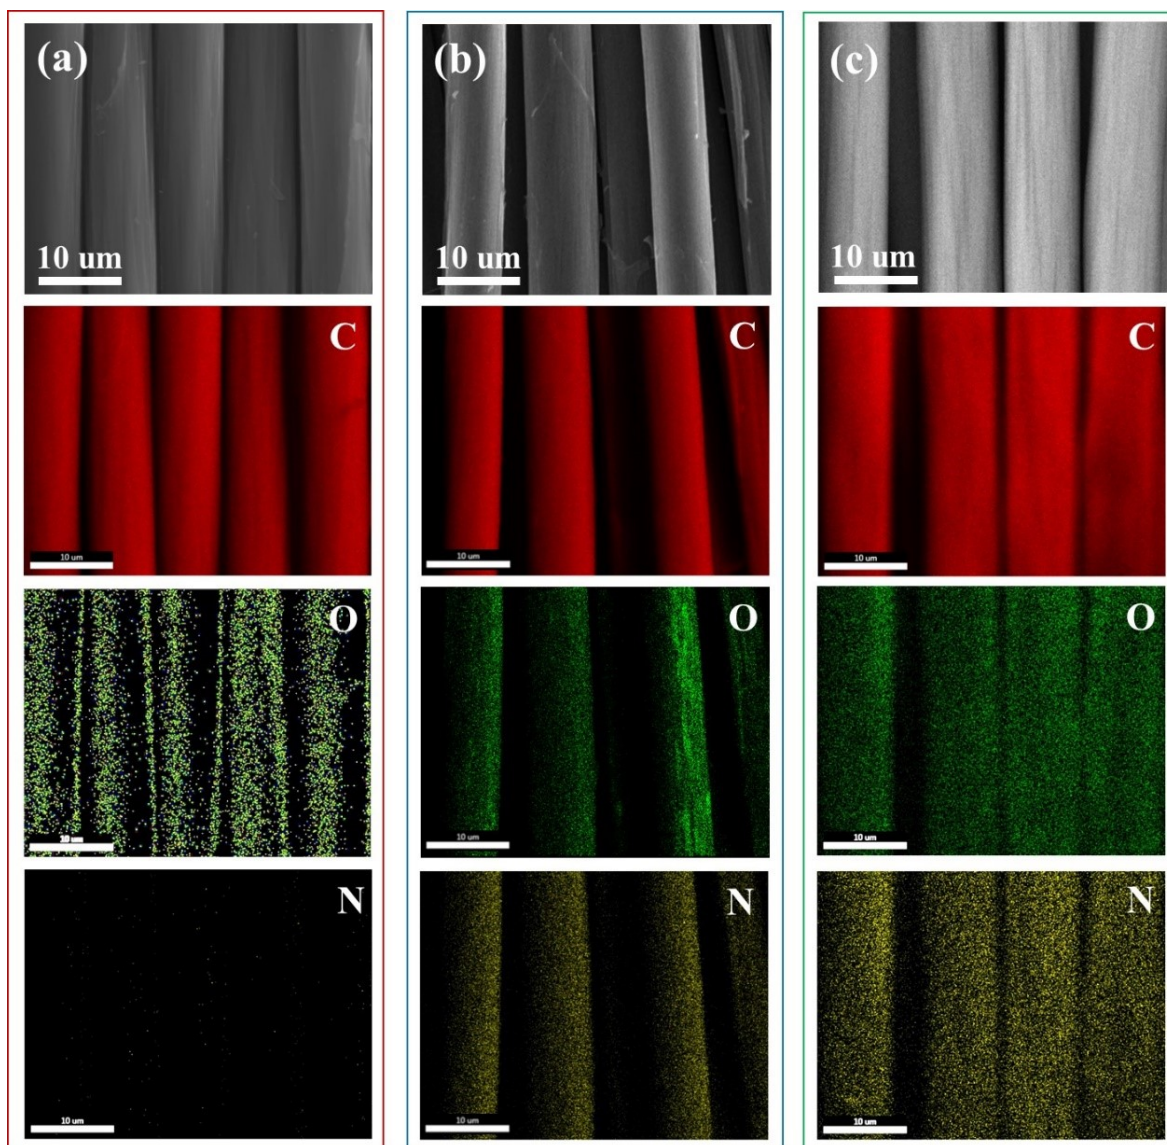

**Figure S1.** EDS mapping images of (a) CC, (b) NCC, and (c) KNCC.

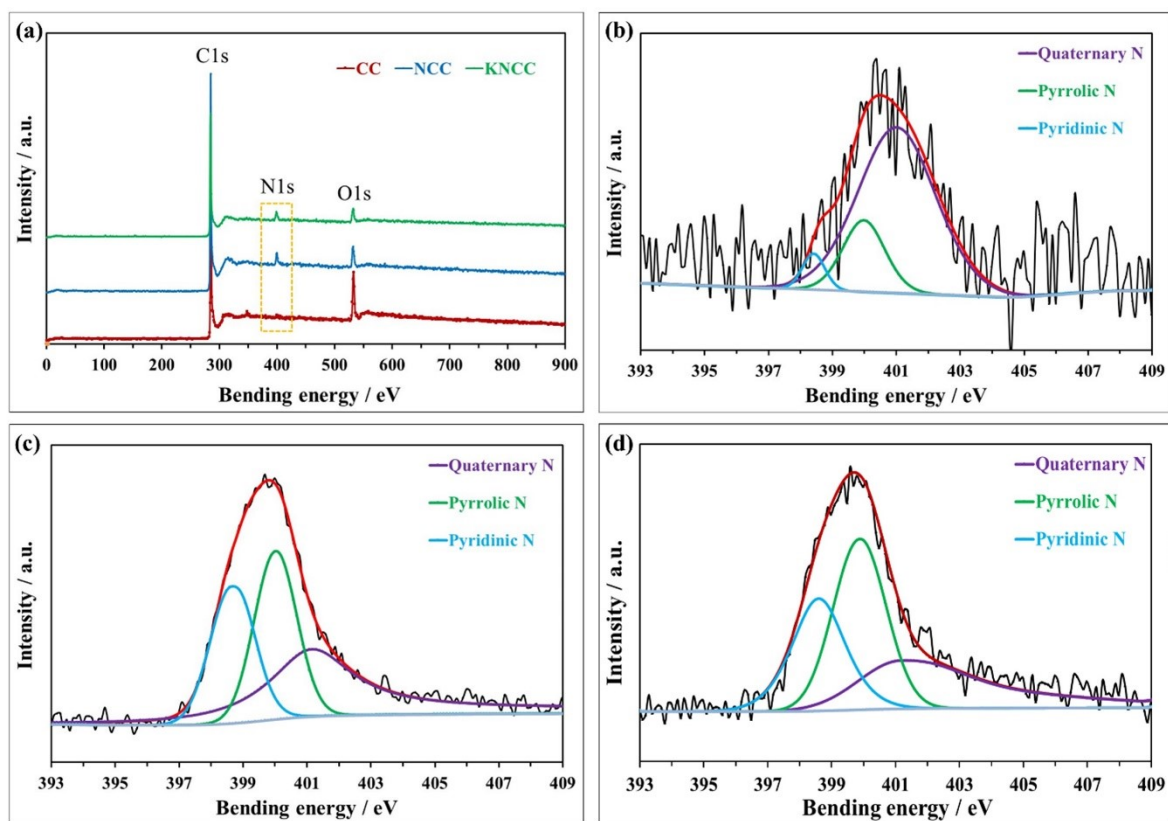

**Figure S2.** (a) Original XPS survey spectra of various materials. N 1s XPS spectra of (b) CC, (c) NCC, and (d) KNCC.

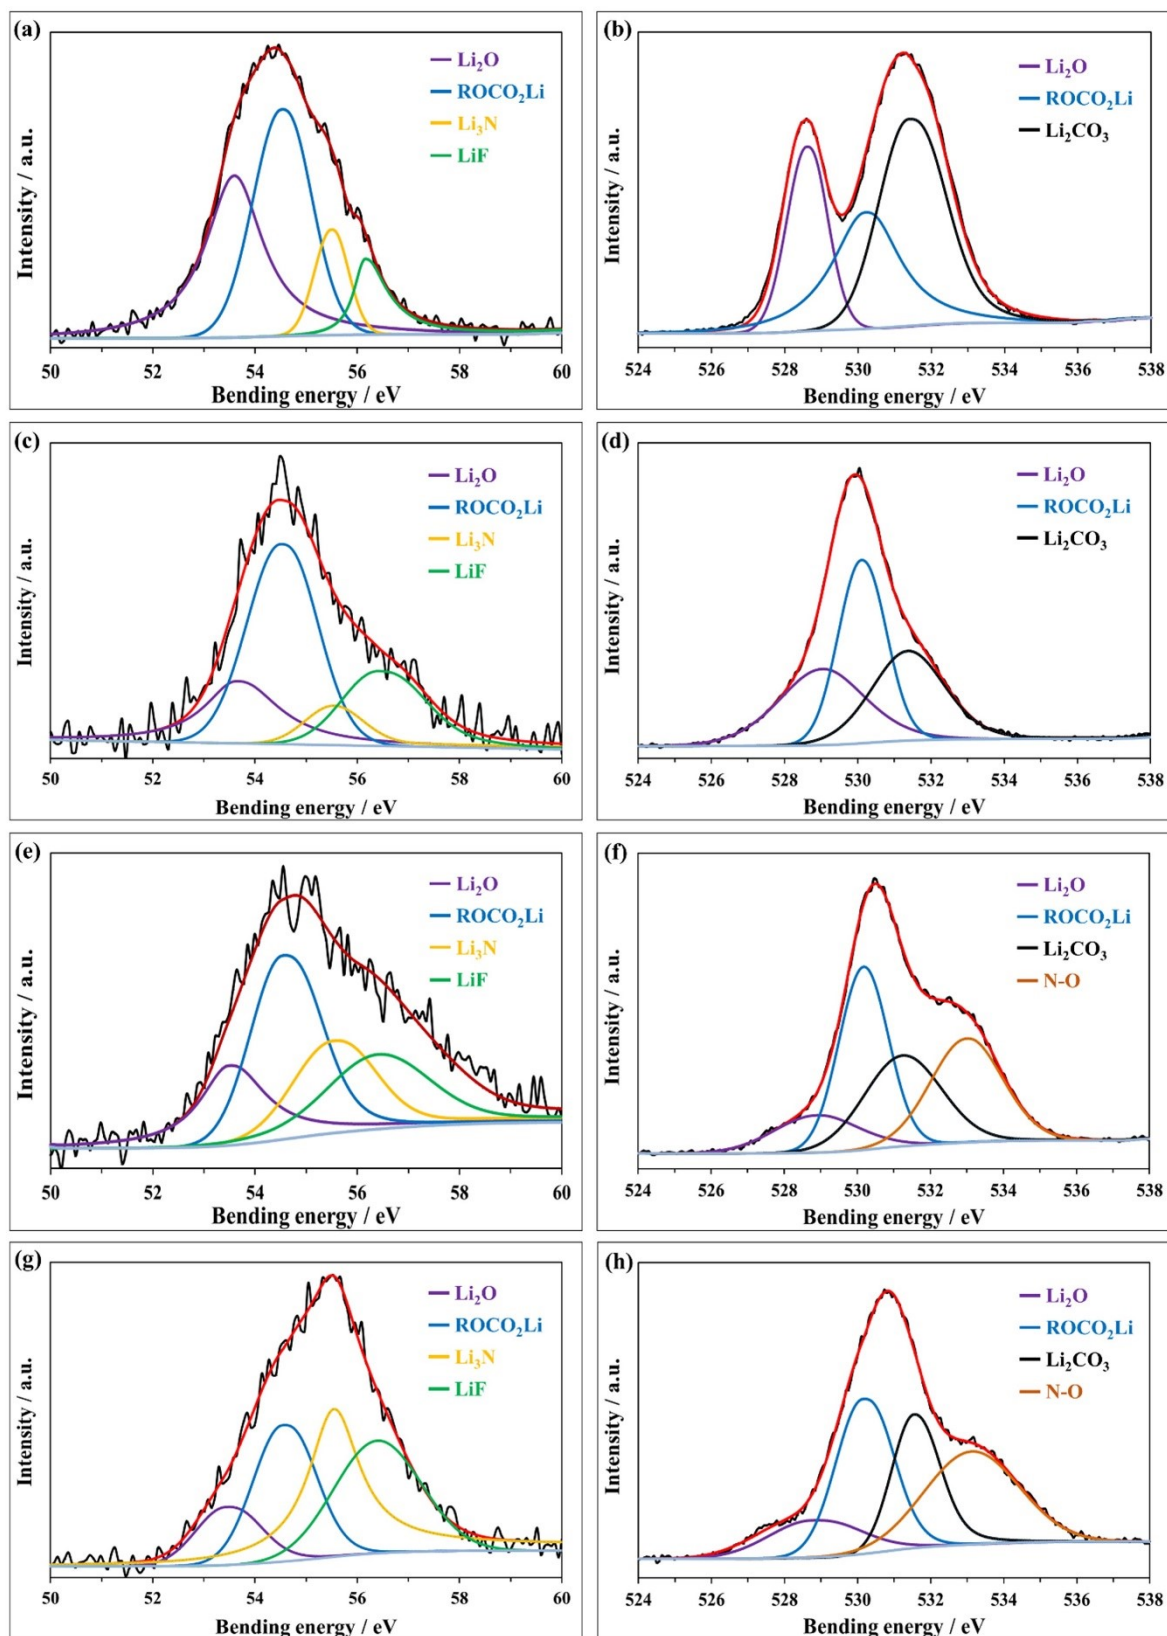

**Figure S3.** (a, c, e, g) Li 1s and (b, d, f, h) O 1s XPS spectra of various anodes retrieved from their corresponding half cells after one initial discharge/charge cycle at a current density of 2

$\text{mA cm}^{-2}$  with a discharge capacity of  $2 \text{ mAh cm}^{-2}$ . (a, b) Cu. (c, d) CC. (e, f) NCC. (g, h) KNCC.

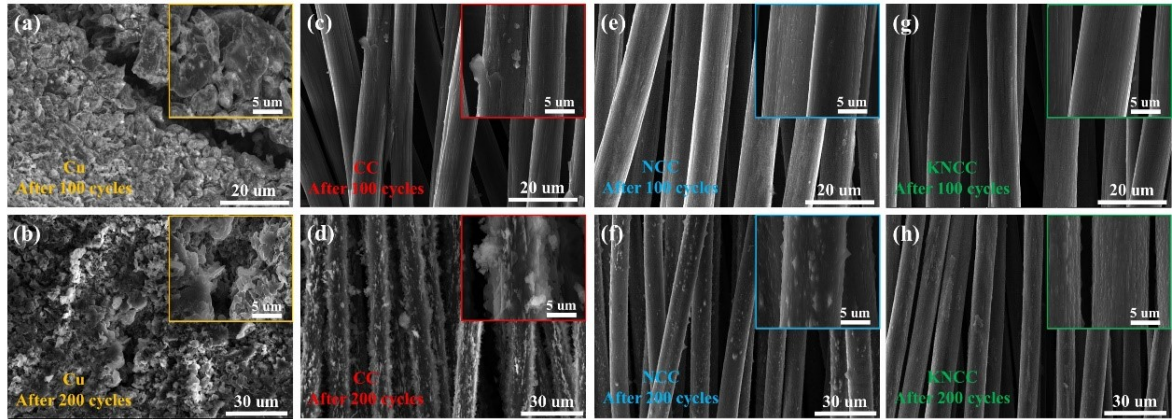

**Figure S4.** SEM images of various anodes retrieved from their corresponding half cells after cycled at a current density of  $2 \text{ mA cm}^{-2}$  with a discharge capacity of  $2 \text{ mAh cm}^{-2}$  for (a, c, e, g) 100 cycles and (b, d, f, h) 200 cycles. (a, b) Cu. (c, d) CC. (e, f) NCC. (g, h) KNCC.

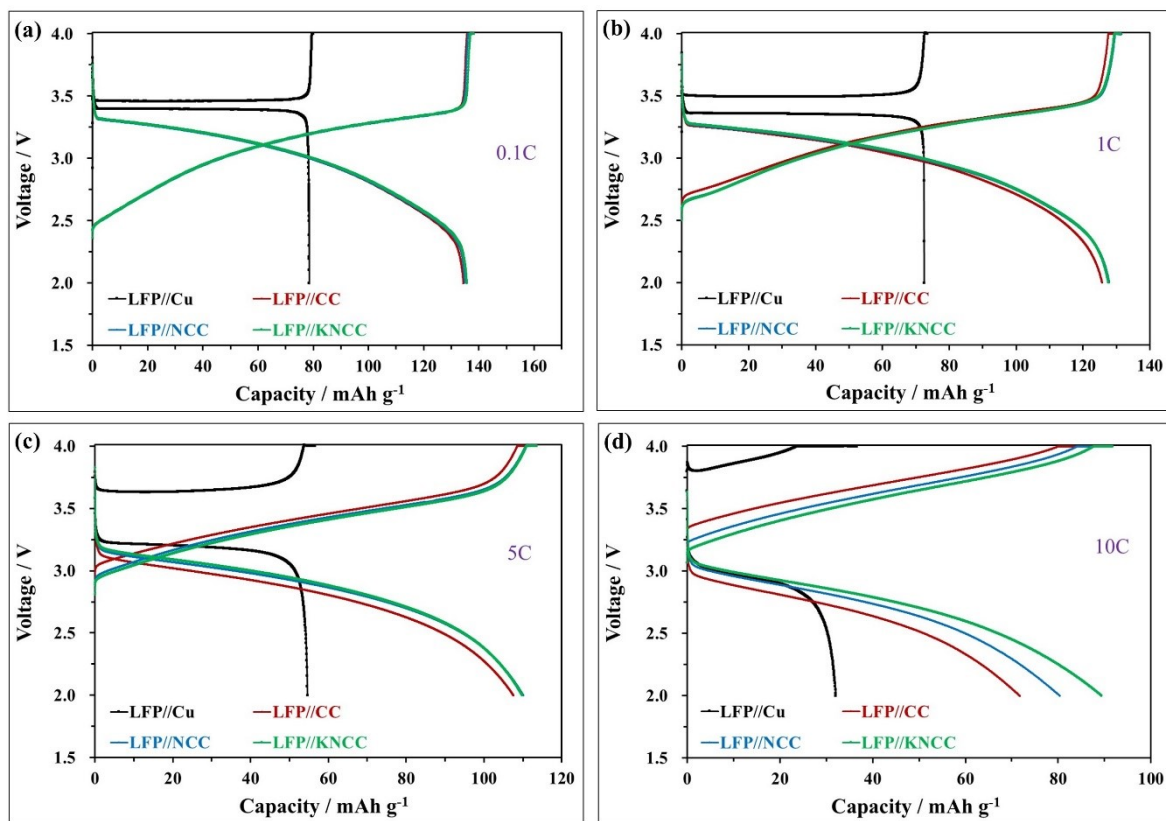

**Figure S5.** Charge/discharge profiles of full cells with various anodes at different currents of (a) 0.1 C, (b) 1 C, (c) 5 C, and (d) 10 C.

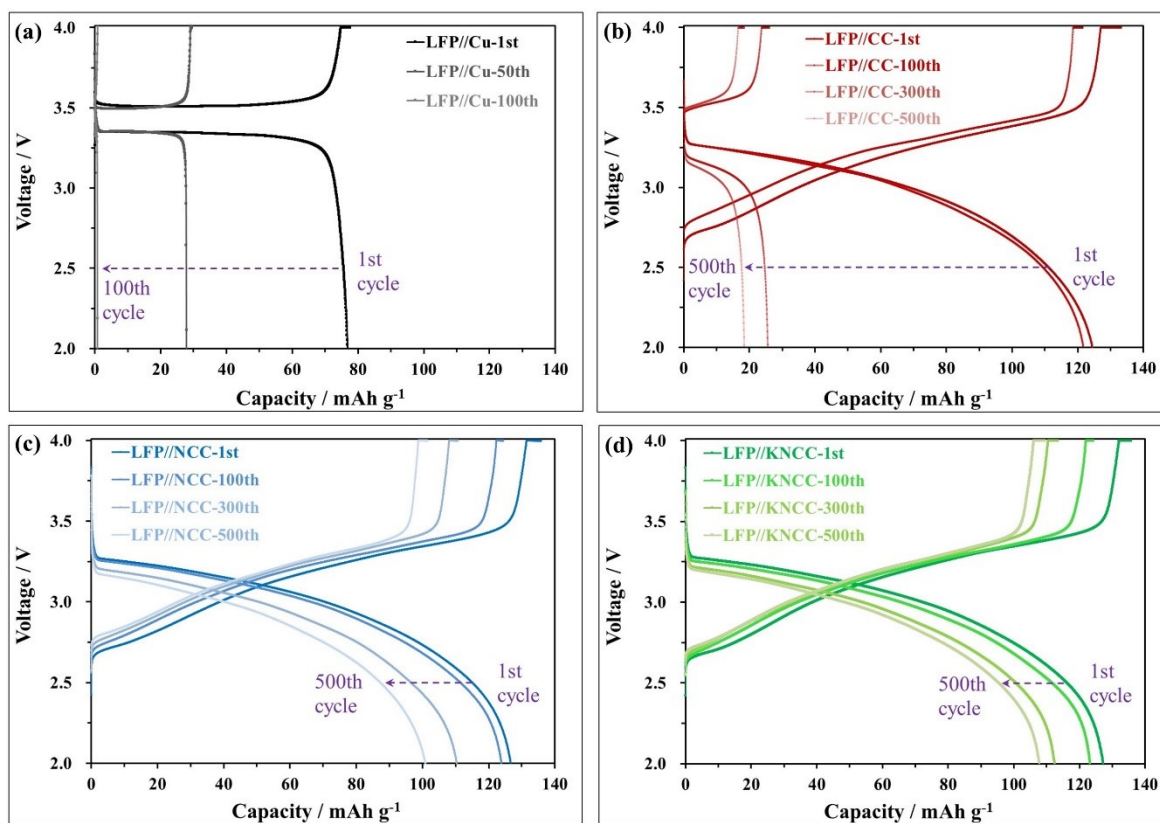

**Figure S6.** Charge/discharge profiles upon cycling at 1 C of full cells with various anodes of (a) Cu, (b) CC, (c) NCC, and (d) KNCC.



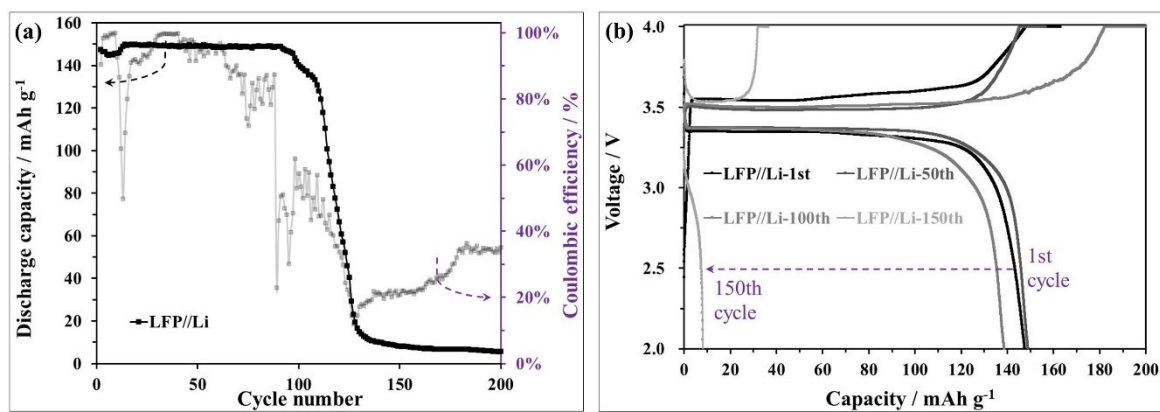

**Figure S7.** (a) Cycling performance and (b) charge/discharge profiles upon cycling at 1 C of a full cell incorporating a conventional Li metal anode.

**Table S1.** BET specific surface areas and DFT pore volumes of various materials.

| Material | Specific surface area<br>(m <sup>2</sup> g <sup>-1</sup> ) | Total pore volume<br>(cm <sup>3</sup> g <sup>-1</sup> ) | Micropore volume<br>(cm <sup>3</sup> g <sup>-1</sup> ) | Mesopore volume<br>(cm <sup>3</sup> g <sup>-1</sup> ) | Macropore volume<br>(cm <sup>3</sup> g <sup>-1</sup> ) |
|----------|------------------------------------------------------------|---------------------------------------------------------|--------------------------------------------------------|-------------------------------------------------------|--------------------------------------------------------|
| CC       | 10.48                                                      | 0.0130                                                  | 0                                                      | 0.0113                                                | 0.0017                                                 |
| NCC      | 10.81                                                      | 0.0177                                                  | 0                                                      | 0.0157                                                | 0.0020                                                 |
| KNCC     | 18.71                                                      | 0.0335                                                  | 0                                                      | 0.0310                                                | 0.0024                                                 |

**Table S2.** Contents of different elements of various materials.

| Material | C<br>(atom.%) | O<br>(atom.%) | N<br>(atom.%) |
|----------|---------------|---------------|---------------|
| CC       | 83.59         | 16.12         | 0.29          |
| NCC      | 87.93         | 6.46          | 5.61          |
| KNCC     | 87.86         | 6.82          | 5.32          |

**Table S3.** Distributions of different types of doped nitrogen of various materials.

| Material | Pyridinic N<br>(atom.%) | Pyrrolic N<br>(atom.%) | Quaternary N<br>(atom.%) |
|----------|-------------------------|------------------------|--------------------------|
| CC       | 4.96                    | 17.95                  | 77.09                    |
| NCC      | 28.50                   | 33.42                  | 38.08                    |
| KNCC     | 27.53                   | 42.22                  | 30.25                    |

**Table S4.** Overall Li binding energies of various materials.

| Material | Overall Li binding energy<br>(eV) |
|----------|-----------------------------------|
| CC       | -48.53                            |
| NCC      | -55.49                            |
| KNCC     | -55.73                            |

Overall Li binding energy of a material is defined as the sum of the binding energies of its 100 atoms with Li according to:

$$E_O = \sum C_x * A_x * E_x$$

where  $E_O$  is overall Li binding energy per 100 atoms of the material,  $C_x$  is the content of a specific element,  $A_x$  is the atomic ratio of a specific type of an element (for carbon,  $A_x = 100\%$ ; for nitrogen,  $A_x$  refers to the atomic ratios of pyridinic N, pyrrolic N, and quaternary N, respectively, in Table S3),  $E_x$  is binding energy of Li with a specific element. According to a previous report [1], the binding energies of Li with carbon, quaternary N, pyridinic N, and pyrrolic N were -0.579 eV, -0.183 eV, -1.003 eV, and -1.379 eV, respectively, which were used for the calculation of  $E_O$  values of various materials in the present work.

**Table S5.** Potential plateaus during the SEI formation of various anodes in half cells.

| Anode | First plateau                |                         | Second plateau               |                         |
|-------|------------------------------|-------------------------|------------------------------|-------------------------|
|       | Potential                    | Length                  | Potential                    | Length                  |
|       | (V, vs. Li/Li <sup>+</sup> ) | (mAh cm <sup>-2</sup> ) | (V, vs. Li/Li <sup>+</sup> ) | (mAh cm <sup>-2</sup> ) |
| Cu    | 0.9551                       | 0.0022                  | 0.0827                       | 0.0061                  |
| CC    | 1.3136                       | 0.0240                  | 0.7433                       | 0.1313                  |
| NCC   | 1.4840                       | 0.0400                  | 0.7507                       | 0.2010                  |
| KNCC  | 1.4950                       | 0.0416                  | 0.7697                       | 0.2521                  |

Current density: 2 mA cm<sup>-2</sup>.

**Table S6.** Initial charge/discharge performances of full cells with various anodes.

| Full cell | Charge capacity<br>(mAh g <sup>-1</sup> ) | Discharge capacity<br>(mAh g <sup>-1</sup> ) | ICE<br>(%) |
|-----------|-------------------------------------------|----------------------------------------------|------------|
| LFP  Cu   | 163.4                                     | 85.3                                         | 52.2       |
| LFP  CC   | 166.9                                     | 135.5                                        | 81.2       |
| LFP  NCC  | 166.0                                     | 136.3                                        | 82.1       |
| LFP  KNCC | 165.7                                     | 136.9                                        | 82.6       |

Current: 0.1 C. Cut-off voltage: 2.0 ~ 4.0 V.

## References

- [1]. Kim, M. S.; Ryu, J.-H.; Deepika; Lim, Y. R.; Nah, I. W.; Lee, K.-R.; Archer, L. A.; Il Cho, W. Langmuir–Blodgett artificial solid-electrolyte interphases for practical lithium metal batteries. *Nat Energy* **2018**, 3, 889-898.
